# Supplementary material for: Enumeration of CD34+ blasts by immunohistochemistry in bone marrow biopsies from MDS patients may have significant impact on final WHO classification
Source: Springer Nature journal article supplement (doi:10.1007/s12308-020-00394-9), 2020-04-23

**Manuscript title: Enumeration of CD34+ blasts by immunohistochemistry in bone marrow biopsies from MDS patients may have significant impact on final WHO classification**

**Supplemental Tables and Figures**

**Suppl. Table 1:** Clinical and morphological characteristics of the study cohort (n=135 MDS patients)

| **BONE MARROW MORPHOLOGY** | | | | | | | | | | **IHC** | | **FCM** |
| --- | --- | --- | --- | --- | --- | --- | --- | --- | --- | --- | --- | --- |
| **No** | **Age** | **Sex** | **IPSS-R  Cytogenetic  risk group** | **WHO 2017** | **Speci-men**  **type** | **BM cellul.**  **%** | **MF, grade (0-3)** | **BM blasts  %** | **PB blasts %** | **CD34 %** | **CD34+ clusters** | **CD34**  **%** |
| 1 | 89 | m | poor | MDS-MLD | clot | 80 | 0 | 3 | 0 | 3 | 0 | 1,2 |
| 2 | 70 | m | good | MDS-MLD | clot | 80 | 1 | 0 | 0 | 0 | 0 | 0,4 |
| 3 | 84 | f | good | del5q | clot | 20 | 0 | 1 | 0 | 0 | 0 | 0,4 |
| 4 | 87 | f | intermediate | MDS-MLD | clot | 90 | 1 | 1 | 0 | 1 | 0 | 1,4 |
| 5 | 84 | m | intermediate | MDS-MLD | clot | 40 | 0 | 0 | 0 | 0 | 0 | 0,7 |
| 6 | 70 | m | poor | MDS-EB1 | clot | 70 | 0 | 6 | 1 | 6 | 0 | 6,0 |
| 7 | 73 | f | good | MDS-RS-MLD | BMB | 100 | 0 | 2 | 0 | 0 | 0 | 0,8 |
| 8 | 89 | m | good | MDS-EB2 | clot | 90 | 0 | 12 | 18 | 7 | 1 | 19 |
| 9 | 64 | m | good | MDS-MLD | clot | 90 | 1 | 3 | 0 | 0 | 0 | 1,0 |
| 10 | 83 | m | good | MDS-SLD | clot | 40 | 0 | 0 | 0 | 0 | 0 | 1,3 |
| 11 | 64 | f | intermediate | MDS-EB2 | BMB | 30 | 0 | 14 | 0 | 10 | 0 | 10,0 |
| 12 | 76 | m | good | MDS-MLD | BMB | 40 | 0 | 0 | 0 | 0 | 0 | 0,9 |
| 13 | 42 | f | intermediate | MDS-EB1 | clot | 60 | 1 | 8 | 0 | 0 | 0 | 4,0 |
| 14 | 73 | m | good | MDS-MLD | BMB | 70 | 0 | 1 | 0 | 0 | 0 | 1,1 |
| 15 | 67 | m | good | MDS-EB1 | BMB | 40 | 1 | 8 | 1 | 15 | 1 | 8,4 |
| 16 | 55 | f | good | MDS-MLD | clot | 70 | 0 | 1 | 0 | 2 | 0 | 2,6 |
| 17 | 47 | f | good | MDS-MLD | clot | 80 | 1 | 1 | 0 | 0 | 0 | 0,8 |
| 18 | 83 | m | very good | MDS-MLD | BMB | 40 | 0 | 0 | 0 | 0 | 0 | 0,4 |
| 19 | 65 | m | poor | MDS-EB2 | clot | 80 | 2 | 10 | 2 | 3 | 0 | 6,0 |
| 20 | 65 | m | good | MDS-EB1 | BMB | 80 | 1 | 8 | 0 | 2 | 0 | 0,9 |
| 21 | 32 | f | intermediate | MDS-MLD | BMB | 50 | 1 | 2 | 0 | 0 | 0 | 0,2 |
| 22 | 81 | f | very poor | MDS-EB2 | clot | 50 | 0 | 11 | 0 | 18 | 1 | 11,0 |
| 23 | 78 | f | good | MDS-MLD | clot | 70 | 2 | 1 | 0 | 0 | 0 | 0,4 |
| 24 | 11 | f | good | RCC | BMB | 60 | 0 | 3 | 0 | 0 | 0 | 0,3 |
| 25 | 77 | f | poor | MDS-MLD | clot | 90 | 1 | 1 | 0 | 3 | 0 | 0,6 |
| 26 | 38 | f | good | del5q | clot | 40 | 0 | 2 | 0 | 2 | 0 | 3,1 |
| 27 | 81 | m | good | MDS-EB1 | clot | 50 | 0 | 7 | 2 | 0 | 0 | 0,2 |
| 28 | 60 | m | good | MDS-MLD | clot | 70 | 0 | 3 | 0 | 0 | 0 | 2,0 |
| 29 | 78 | m | good | MDS-MLD | clot | 20 | 0 | 3 | 0 | 0 | 0 | 2,5 |
| 30 | 15 | m | m.d. | MDS-EB2 | BMB | 100 | 1 | 12 | 0 | 18 | 1 | 15,0 |
| 31 | 37 | f | intermediate | MDS-MLD | clot | 30 | 0 | 0 | 0 | 0 | 0 | 0,4 |
| 32 | 43 | f | good | MDS-MLD | BMB | 60 | 1 | 2 | 0 | 0 | 0 | 0,5 |
| 33 | 88 | f | good | MDS-MLD | BMB | 70 | 0 | 2 | 0 | 1 | 0 | 1,4 |
| 34 | 76 | f | good | MDS-RS-MLD | BMB | 80 | 0 | 1 | 0 | 0 | 0 | 0,7 |
| 35 | 77 | m | intermediate | MDS-MLD | clot | 60 | 1 | 3 | 0 | 6 | 0 | 3,6 |
| 36 | 85 | f | good | MDS-EB2 | clot | 80 | 0 | 10 | 0 | 15 | 1 | 11,0 |
| 37 | 61 | m | good | MDS-MLD | clot | 30 | 0 | 0 | 0 | 0 | 0 | 0,2 |
| 38 | 75 | m | good | del5q | clot | 70 | 2 | 2 | 0 | 3 | 0 | 1,6 |
| 39 | 66 | f | good | MDS-RS-MLD | BMB | 100 | 1 | 4 | 0 | 2 | 0 | 0,3 |
| 40 | 70 | f | very good | MDS-MLD | BMB | 40 | 0 | 3 | 0 | 0 | 0 | 2,3 |
| 41 | 11 | m | good | MDS-MLD | BMB | 40 | 0 | 1 | 0 | 0 | 0 | 0,2 |
| 42 | 76 | m | good | MDS-EB2 | BMB | 80 | 1 | 12 | 0 | 4 | 0 | 4,0 |
| 43 | 17 | m | poor | RCC | BMB | 40 | 0 | 3 | 0 | 2 | 0 | 2,6 |
| 44 | 12 | f | intermediate | RCC | BMB | 80 | 1 | 1 | 0 | 0 | 0 | 0,7 |
| 45 | 80 | f | good | MDS-MLD | clot | 70 | 0 | 3 | 0 | 4 | 0 | 4,0 |
| 46 | 79 | m | very good | MDS-RS-MLD | clot | 50 | 0 | 0 | 0 | 0 | 0 | 0,6 |
| 47 | 42 | f | good | MDS-MLD | BMB | 80 | 2 | 2 | 0 | 0 | 0 | 0,5 |
| 48 | 87 | m | good | MDS-RS-MLD | clot | 70 | 0 | 1 | 0 | 1 | 0 | 1,3 |
| 49 | 2 | m | very poor | MDS-MLD | BMB | 100 | 3 | 2 | 0 | 2 | 1 | 0,1 |
| 50 | 74 | m | good | MDS-EB1 | BMB | 70 | 0 | 7 | 0 | 0 | 0 | 1,2 |
| 51 | 32 | f | good | MDS-MLD | BMB | 90 | 1 | 3 | 0 | 0 | 0 | 1,1 |
| 52 | 38 | f | good | MDS-SLD | clot | 60 | 0 | 2 | 0 | 0 | 0 | 1,4 |
| 53 | 71 | m | good | MDS-MLD | BMB | 70 | 2 | 2 | 0 | 0 | 0 | 0,9 |
| 54 | 77 | f | good | del5q | clot | 30 | 0 | 2 | 0 | 3 | 0 | 2,4 |
| 55 | 74 | m | very poor | MDS-EB1 | clot | 40 | 1 | 6 | 0 | 2 | 0 | 3,0 |
| 56 | 61 | m | poor | MDS-MLD | BMB | 70 | 0 | 2 | 0 | 0 | 0 | 0,2 |
| 57 | 72 | m | intermediate | MDS-MLD | clot | 100 | 1 | 2 | 0 | 0 | 0 | 2,0 |
| 58 | 64 | m | good | MDS-MLD | BMB | 30 | 1 | 2 | 0 | 0 | 0 | 0,3 |
| 59 | 72 | f | intermediate | MDS-MLD | BMB | 20 | 0 | 2 | 0 | 0 | 0 | 0,1 |
| 60 | 62 | m | good | MDS-MLD | clot | 90 | 0 | 2 | 0 | 0 | 0 | 1,3 |
| 61 | 67 | f | m.d. | MDS-MLD | clot | 40 | 0 | 2 | 0 | 0 | 0 | 0,7 |
| 62 | 70 | f | good | MDS-RS-MLD | clot | 60 | 1 | 0 | 0 | 0 | 0 | 0,8 |
| 63 | 72 | f | good | del5q | BMB | 60 | 1 | 2 | 0 | 3 | 0 | 1,6 |
| 64 | 81 | m | m.d. | MDS-MLD | clot | 30 | 1 | 1 | 0 | 0 | 0 | 1,5 |
| 65 | 85 | m | good | MDS-MLD | clot | 30 | 0 | 3 | 0 | 0 | 0 | 9,0 |
| 66 | 67 | m | good | MDS-EB1 | BMB | 70 | 0 | 7 | 0 | 2 | 0 | 2,0 |
| 67 | 73 | f | good | MDS-EB1 | clot | 30 | 0 | 8 | 1 | 18 | 0 | 8,0 |
| 68 | 65 | f | good | MDS-MLD | clot | 60 | 0 | 1 | 0 | 0 | 0 | 0,8 |
| 69 | 77 | m | very poor | MDS-EB1 | BMB | 80 | 0 | 7 | 0 | 8 | 0 | m.d. |
| 70 | 76 | f | very poor | MDS-EB1 | BMB | 60 | 0 | 5 | 0 | 13 | 1 | m.d. |
| 71 | 60 | m | good | MDS-EB1 | BMB | 60 | 0 | 6 | 2 | 3 | 0 | m.d. |
| 72 | 75 | m | very poor | MDS-MLD | BMB | 90 | 2 | 3 | 0 | 7 | 0 | m.d. |
| 73 | 72 | f | good | MDS-EB1 | BMB | 80 | 1 | 8 | 2 | 8 | 0 | m.d. |
| 74 | 79 | m | very poor | MDS-EB2 | BMB | 80 | 2 | 18 | 3 | 15 | 1 | m.d. |
| 75 | 56 | m | very poor | MDS-EB1 | BMB | 60 | 0 | 6 | 0 | 8 | 0 | m.d. |
| 76 | 50 | f | very poor | MDS-MLD | BMB | 40 | 0 | 2 | 0 | 1 | 0 | m.d. |
| 77 | 64 | m | very poor | MDS-EB1 | BMB | 70 | 0 | 8 | 3 | 8 | 1 | m.d. |
| 78 | 73 | m | very poor | MDS-EB1 | BMB | 100 | 1 | 9 | 0 | 10 | 0 | m.d. |
| 79 | 74 | m | very poor | MDS-EB1 | BMB | 70 | 1 | 7 | 0 | 6 | 1 | m.d. |
| 80 | 63 | f | very poor | MDS-EB2 | BMB | 80 | 0 | 15 | 2 | 10 | 0 | m.d. |
| 81 | 64 | m | very poor | MDS-EB1 | BMB | 80 | 2 | 8 | 3 | 4 | 0 | m.d. |
| 82 | 77 | f | very poor | MDS-EB2 | BMB | 80 | 1 | 11 | 0 | 14 | 0 | m.d. |
| 83 | 57 | m | very poor | MDS-EB1 | BMB | 90 | 0 | 6 | 0 | 4 | 0 | m.d. |
| 84 | 74 | f | good | MDS-MLD | BMB | 80 | 0 | 2 | 0 | 2 | 0 | m.d. |
| 85 | 76 | f | very poor | MDS-MLD | BMB | 30 | 0 | 2 | <1 | 5 | 0 | m.d. |
| 86 | 58 | m | very poor | MDS-MLD | BMB | 60 | 0 | 4 | 0 | 10 | 1 | m.d. |
| 87 | 73 | m | very poor | MDS-MLD | BMB | 80 | 2 | 1 | 0 | 0 | 0 | m.d. |
| 88 | 79 | m | very poor | MDS-EB2 | BMB | 50 | 0 | 10 | 1 | 12 | 1 | m.d. |
| 89 | 79 | m | very poor | MDS-MLD | BMB | 70 | 1 | 3 | 0 | 12 | 1 | m.d. |
| 90 | 65 | f | very poor | MDS-EB1 | BMB | 90 | 1 | 9 | 1 | 13 | 1 | m.d. |
| 91 | 79 | f | good | MDS-MLD | BMB | 30 | 1 | 2 | 0 | 6 | 0 | m.d. |
| 92 | 77 | f | very poor | MDS-EB1 | BMB | 100 | 2 | 4 | 1 | 3 | 0 | m.d. |
| 93 | 69 | m | very poor | MDS-EB1 | BMB | 70 | 2 | 8 | 0 | 8 | 0 | m.d. |
| 94 | 83 | m | very poor | MDS-EB2 | BMB | 70 | 0 | 11 | 0 | 12 | 0 | m.d. |
| 95 | 66 | m | good | MDS-EB1 | BMB | 50 | 0 | 7 | 0 | 12 | 1 | m.d. |
| 96 | 37 | f | very poor | MDS-RS-MLD | BMB | 80 | 0 | 3 | 0 | 5 | 0 | m.d. |
| 97 | 63 | m | very poor | MDS-MLD | BMB | 60 | 1 | 1 | 0 | 1 | 0 | m.d. |
| 98 | 74 | f | very poor | MDS-EB2 | BMB | 100 | 1 | 15 | 0 | 8 | 1 | m.d. |
| 99 | 69 | m | very poor | MDS-MLD | BMB | 50 | 0 | 3 | 0 | 5 | 0 | m.d. |
| 100 | 70 | m | very poor | MDS-EB1 | BMB | 70 | 2 | 5 | 2 | 5 | 0 | m.d. |
| 101 | 70 | f | very poor | MDS-MLD | BMB | 100 | 2 | 1 | 0 | 0 | 0 | m.d. |
| 102 | 79 | f | m.d. | MDS-EB2 | BMB | 40 | 0 | 12 | 1 | 12 | 1 | m.d. |
| 103 | 74 | m | very poor | MDS-EB1 | BMB | 80 | 2 | ND | 0 | 8 | 1 | m.d. |
| 104 | 74 | m | very poor | MDS-MLD | BMB | 50 | 0 | 3 | 0 | 3 | 0 | m.d. |
| 105 | 74 | m | very poor | MDS-EB2 | BMB | 100 | 0 | 15 | 0 | 15 | 1 | m.d. |
| 106 | 70 | f | very poor | MDS-MLD | BMB | 60 | 0 | 3 | 0 | 3 | 0 | m.d. |
| 107 | 64 | m | good | MDS-EB2 | BMB | 100 | 2 | ND | 1 | 10 | 1 | m.d. |
| 108 | 69 | m | poor | MDS-MLD | BMB | 100 | 0 | 3 | 0 | 5 | 0 | m.d. |
| 109 | 58 | m | very poor | MDS-MLD | BMB | 80 | 1 | 3 | 0 | 3 | 0 | m.d. |
| 110 | 68 | f | very poor | MDS-MLD | BMB | 80 | 2 | 4 | 0 | 7 | 1 | m.d. |
| 111 | 71 | f | good | MDS-MLD | BMB | 40 | 1 | 0 | 0 | 0 | 0 | m.d. |
| 112 | 55 | m | very poor | MDS-EB1 | BMB | 70 | 0 | 5 | 0 | 10 | 1 | m.d. |
| 113 | 48 | f | good | MDS-EB2 | BMB | 50 | 2 | 10 | 1 | 13 | 1 | m.d. |
| 114 | 83 | m | very poor | MDS-EB1 | BMB | 80 | 2 | 7 | 0 | 5 | 0 | 1,0 |
| 115 | 84 | f | very poor | MDS-EB1 | BMB | 70 | 0 | 8 | 1 | 14 | 1 | 8,0 |
| 116 | 67 | m | intermediate | MDS-MLD | BMB | 40 | 0 | 4 | 0 | 4 | 0 | 2,0 |
| 117 | 67 | m | intermediate | MDS-MLD | BMB | 40 | 0 | 4 | 0 | 0 | 0 | 0,3 |
| 118 | 77 | m | intermediate | MDS-MLD | BMB | 40 | 0 | 1 | 0 | 1 | 0 | 1,0 |
| 119 | 85 | m | m.d. | MDS-EB1 | BMB | 70 | 0 | 8 | 0 | 10 | 1 | 7,0 |
| 120 | 77 | f | good | MDS-MLD | BMB | 40 | 0 | 2 | 0 | 0 | 0 | 2,0 |
| 121 | 61 | f | good | MDS-EB1 | BMB | 70 | 0 | 8 | 0 | 8 | 1 | 5,0 |
| 122 | 73 | f | good | MDS-MLD | BMB | 40 | 0 | 1 | 0 | 1 | 0 | 0,5 |
| 123 | 73 | m | very poor | MDS-MLD | BMB | 100 | 2 | 4 | 0 | 2 | 0 | 3,0 |
| 124 | 71 | m | good | MDS-MLD | BMB | 50 | 0 | 4 | 0 | 4 | 0 | 2,0 |
| 125 | 67 | m | good | MDS-EB1 | BMB | 60 | 0 | 7 | 0 | 10 | 1 | 9,0 |
| 126 | 80 | f | good | del5q | BMB | 60 | 0 | 2 | 0 | 2 | 0 | 3,0 |
| 127 | 69 | m | m.d. | MDS-EB2 | BMB | 80 | 0 | 12 | 2 | 12 | 1 | 12,0 |
| 128 | 71 | m | good | MDS-SLD | BMB | 40 | 0 | 1 | 0 | 1 | 0 | 1,5 |
| 129 | 70 | m | good | MDS-MLD | BMB | 50 | 0 | 4 | 2 | 6 | 0 | 2,0 |
| 130 | 58 | m | good | MDS-MLD | BMB | 100 | 0 | 4 | 0 | 2 | 0 | 1,0 |
| 131 | 68 | f | good | MDS-MLD | BMB | 80 | 0 | 4 | 0 | 4 | 0 | 4,0 |
| 132 | 76 | f | very poor | MDS-MLD | BMB | 50 | 0 | 3 | 0 | 13 | 1 | 3,0 |
| 133 | 73 | m | poor | MDS-EB1 | BMB | 70 | 0 | ND | 1 | 10 | 0 | 3,0 |
| 134 | 86 | m | very poor | MDS-EB2 | BMB | 10 | 0 | 11 | 3 | 0 | 0 | ND |
| 135 | 43 | f | very poor | MDS-EB1 | BMB | 60 | 0 | 8 | 1 | 13 | 1 | 5,0 |

MDS-SLD, MDS with single lineage dysplasia; MDS-MLD, MDS with multilineage dysplasia; MDS-EB, MDS with excess blasts (MDS-EB-1: BM 5-9%, PB 2-4%; MDS-EB-2: BM 10-19%, PB, 5-19%); RCC, refractory cytopenia of childhood; m.d., missing data; ND, non-diagnostic (hemodiluted); BMB, Bone marrow trephine biopsy

**Suppl. Table 2:** Clinical and morphological characteristics of AML-MRC patients (n=21)

| **No** | **Age** | **Sex** | **Karyotype** | **WHO 2017** | **Sample type** | **HISTO- AND CYTOMORPHOLOGY** | | | | **IHC** |
| --- | --- | --- | --- | --- | --- | --- | --- | --- | --- | --- |
| **Cellu-larity  %** | **MF, grade (0-3)** | **BM blasts %** | **PB blasts %** | **CD34 %** |
| 1 | 52 | M | complex with del5q | AML-MRC | BMT | 100 | 1 | 21 | 2 | 21 |
| 2 | 57 | f | del5q, del7q | AML-MRC | BMT | 70 | 1 | 45 | 3 | 34 |
| 3 | 78 | m | complex with del5q | AML-MRC | BMT | 80 | 1 | 28 | 3 | 30 |
| 4 | 76 | f | 46,XX, del5q(q14q34) | AML-MRC | BMT | 30 | 0 | 24 | 6 | 35 |
| 5 | 62 | m | 46,XX,del5q, -17 | AML-MRC | BMT | 30 | 0 | 22 | 15 | 75 |
| 6 | 78 | m | complex with del5q | AML-MRC | BMT | 40 | 0 | 10 | 0 | 22 |
| 7 | 83 | f | complex with del5q | AML-MRC | BMT | 100 | 0 | 80 | 8 | 75 |
| 9 | 75 | m | complex with del5q | AML-MRC | BMT | 80 | 1 | 18 | 3 | 25 |
| 10 | 76 | f | complex with del5q | AML-MRC | BMT | 90 | 3 | 23 | 15 | 28 |
| 11 | 72 | m | complex with del5q | AML-MRC | BMT | 70 | 0 | 18 | 0 | 38 |
| 12 | 83 | f | complex, del5q, del17p | AML-MRC | BMT | 90 | 2 | 21 | 4 | 34 |
| 13 | 65 | m | m.d. | AML-MRC | BMT | 70 | 0 | 53 | m.d. | 42 |
| 14 | 52 | f | complex with del5q | AML-MRC | BMT | 10 | 1 | ND | m.d. | 32 |
| 15 | 75 | f | complex with del5q, -17 | AML-MRC | BMT | 60 | 1 | 4 | 0 | 25 |
| 16 | 73 | m.d. | m.d. | AML-MRC | BMT | 70 | 1 | 38 | m.d. | 36 |
| 17 | 76 | m | complex with del5q | AML-MRC | BMT | 70 | 0 | 21 | 0 | 25 |
| 18 | 67 | m | complex with del5q | AML-MRC | BMT | 70 | 0 | 10 | 1 | 22 |
| 19 | 54 | m | complex with del5q | AML-MRC | BMT | 100 | 0 | 20 | 10 | 9 |
| 20 | 65 | f | complex with del5q | AML-MRC | BMT | 50 | 1 | 30 | 0 | 30 |
| 21 | 82 | f | 46,XX, del5q, add 17qm add8q | AML-MRC | BMT | 60 | 0 | 12 | 0 | 32 |

AML-MRC, AML with myelodysplasia-related changes; m.d., missing data; ND, non-diagnostic (hemodiluted)

**Suppl. Table 3: Multiparameter Flow Cytometry (4-color panel)**

| **Tube** | **FITC** | **PE** | **PerCP** | **APC** |
| --- | --- | --- | --- | --- |
| 1 | CD61 | GPA | CD14 | CD45 |
| 2 | CD13 | CD11b | CD45 | CD34 |
| 3 | CD15 | CD117 | HLA-DR | CD45 |

**Suppl. Table 4: Multiparameter Flow Cytometry (8-color panel)**

| **Tube** | **FITC** | **PE** | **PE-Cy5** | **PE-Cy7** | **APC** | **APC-Cy7** | **PaBl/V450** | **V500** |
| --- | --- | --- | --- | --- | --- | --- | --- | --- |
| 1 | CD7 | GPA | CD34 | CD117 | CD10 | CD19 | HLA-DR | CD45 |
| 2 | CD56 | CD13 | CD34 | CD117 | CD33 | CD11b | HLA-DR | CD45 |
| 3 | CD36 | CD64 | CD34 | CD117 | CD33 | CD14 | HLA-DR | CD45 |

**Suppl. Table 5.** Comparison of manual and automated count of CD34-positive blast cells in BM biopsies from MDS patients

| **Sample ID** | **IHC CD34 (%)** | **Automated CD34 blast count (%) in predefined annotation areas** | | | | **Comments** |
| --- | --- | --- | --- | --- | --- | --- |
| **Area 1** | **Area 2** | **Area 3** | **Average % (1-3)** |
| 76 | 1 | 1,56 | 1,21 | 2,41 | 1,73 | Comparable results between measurements |
| 80 | 10 | 5,65 | - | - | 5,65 | Only one annotation, short biopsy; many megakaryocytes with aberrant CD34 expression |
| 81 | 4 | 4,43 | 0,73 | 0 | 1,72 | Difficult to analyze, nuclei partly stained |
| 82 | 14 | 7,18 | 8,91 | 10,53 | 8,87 | Uneven distribution of blast cells |
| 83 | 4 | 4,58 | 7,93 | 5,42 | 5,98 | Comparable results between measurements |
| 84 | 2 | 0,3 | 0,43 | 0,49 | 0,41 | Lower range (<5%) for all measurements |
| 85 | 5 | 3,73 | 3,32 | 5,76 | 4,27 | Comparable results between measurements |
| 86 | 10 | 0,82 | 0,42 | 0,28 | 0,51 | Many blast cells not counted due to weak granular cytoplasmatic and weak nuclear staining |
| 88 | 12 | 13,14 | - | - | 13,14 | Only one annotation, short biopsy |
| 90 | 13 | 15,73 | 12,63 | 16,68 | 15,01 | Comparable results between measurements |
| 92 | 3 | 10,35 | 15,17 | 11,35 | 12,29 | High microvessel density; many micromegakaryocytes with strong aberrant CD34 expression |
| 93 | 8 | 2,41 | 2,62 | 1,99 | 2,34 | Small blast cells; nucleus partly stained and not recognizable in all cells |
| 95 | 12 | 1,06 | 1,32 | 2,66 | 1,68 | Weak, "cloudy" CD34+ staining; small blast cells |
| 97 | 1 | 1,4 | 1,99 | 0,57 | 1,32 | Comparable results between measurements |
| 99 | 5 | 2,24 | 1,81 | 1,63 | 1,89 | Small blast cells; unspecific background staining |
| 100 | 8 | 16,1 | 11,13 | 7,9 | 11,71 | Increased number of megakaryocytes with strong cytoplasmatic CD34 staining; partly weak nuclear counterstain in true blast cells |
| 101 | 5 | 4,02 | 3,19 | 3,18 | 3,46 | Comparable results between measurements |
| 104 | 3 | 8,68 | 4,97 | 7,67 | 7,11 | Small blast cells, single rounded microvessels; unspecific background staining |
| 105 | 15 | 12,27 | 21,96 | 20,03 | 18,09 | Comparable results; predominantly small blast cells |
| 106 | 3 | 11,29 | 20,24 | 15,24 | 15,59 | Increased number of micromegakaryocytes with strong cytoplasmatic CD34 staining; many microvessels |
| 107 | 10 | 33,74 | 36,25 | 34,6 | 34,86 | High microvessel density; micromegakaryocytes with CD34 expression; rounded, non-nucleated structures and non-blast cells (*e.g.* endothelial cells) counted “positive” |
| 109 | 3 | 2,74 | 2,94 | - | 2,84 | Fragmented biopsy, two small annotations |
| 110 | 7 | 14,48 | 3,99 | 1,25 | 6,57 | Difficult to count with marked variation in the distribution (percentage) of blast cells in different areas within the biopsy |
| 112 | 10 | 6,44 | 2,44 | 4,83 | 4,57 | Weak nucleus counterstain; color compensation (deconvolution) needed |
| 113 | 13 | 3,55 | 5,52 | 65 | 54 | Many small blast cells; on average more likely <10%, but with some variation |

**Supplemental Figures**

**Suppl. Figure 1.** Interobserver correlation for the assessment of CD34-positive blast cells in BM biopsies from MDS and AML patients.

**Suppl. Figure 2**: Correlation between the blast count by CM and the percentage of CD34-positive blast cells by IHC in BM biopsies from MDS patients (n=132; *p*=0,242 for absolute values, *p*=0,113 for groups).

**Suppl. Figure 3:** Correlation between the blast count by CM and the percentage of CD34-positive myeloid blasts by FCM in MDS patients (n=88; *p*<0,01 for absolute values and blast groups)

**Suppl. Figure 4:** Correlation between the percentage of CD34+ blast cells by IHC and the percentage of CD34+ myeloid blasts by FCM in MDS patients (n=89; Pearson’s r 0,767, p=0,172 for absolute values, *p*=0,012 for blast groups)

**Suppl. Figure 5.** Percentage of myeloid blasts (CD45dim CD34+CD117+) 1,8% of total BM cells; percentage of normal early B-cell precursors (CD45dim low SSC CD34+CD117-) is 0,08% of total BM cells (case #129).


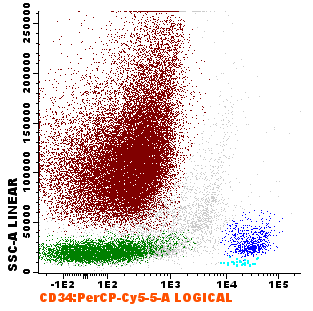

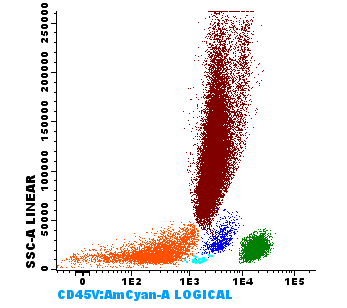


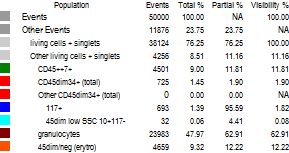


**Suppl Figure 6.** a)OS for MDS-MLD patients with <5% by both methods as compared to patients with higher blast percentage (≥5%) by CD34 IHC. b) OS for MDS-EB1 patients with blast percentage within the same range (≥5-9%) by both methods as compared to patients with ≥10% by CD34 IHC

a)


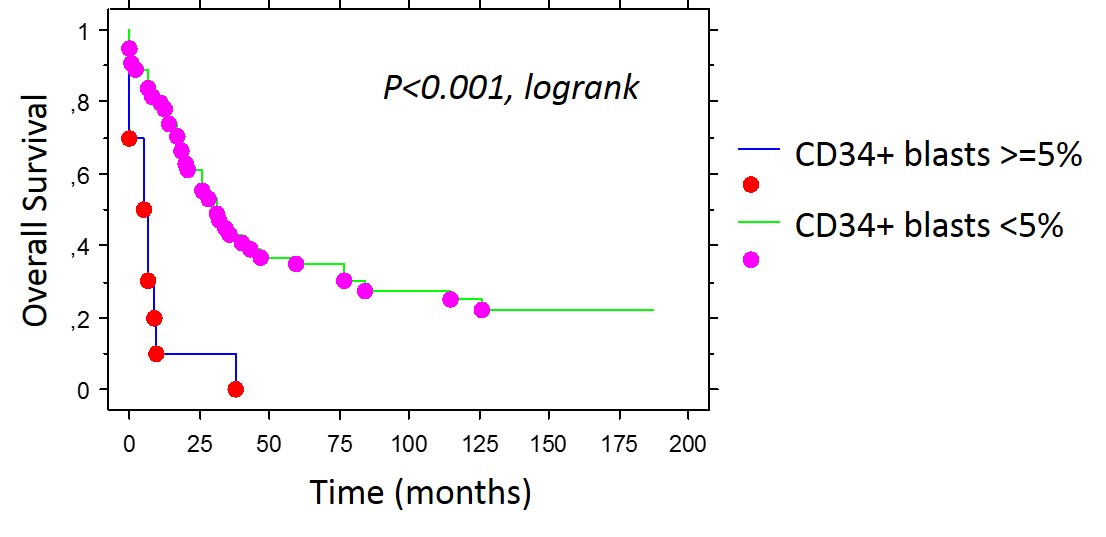


b)


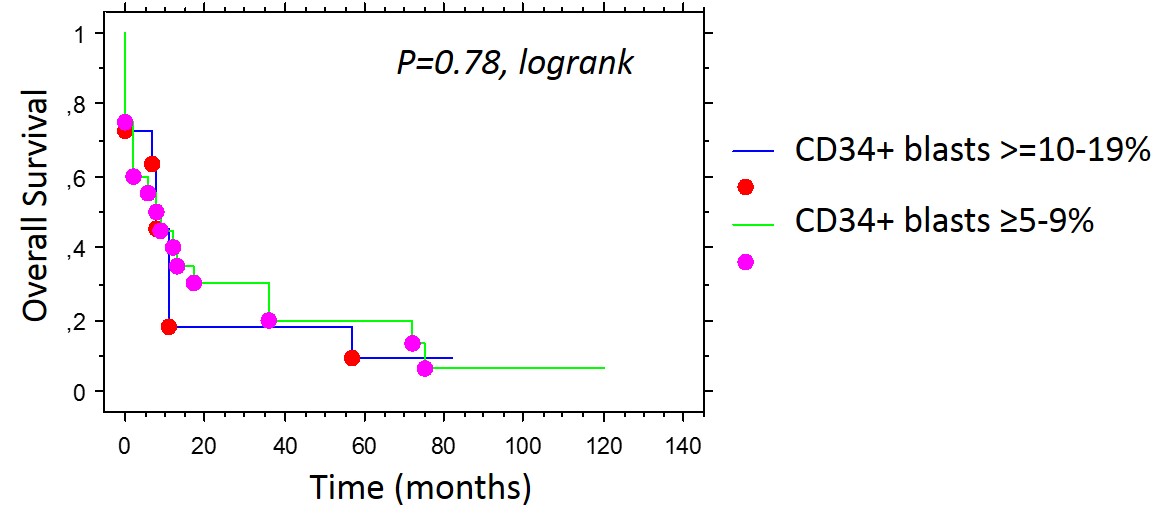

Supplement: MOESM1 [file 17923454]
